# Supplementary material
Source: Springer Nature journal article supplement (https://www.springermedizin.de/resource/supplementary/13102_2009_29_MOESM1_ESM.pdf/9667604)

**A**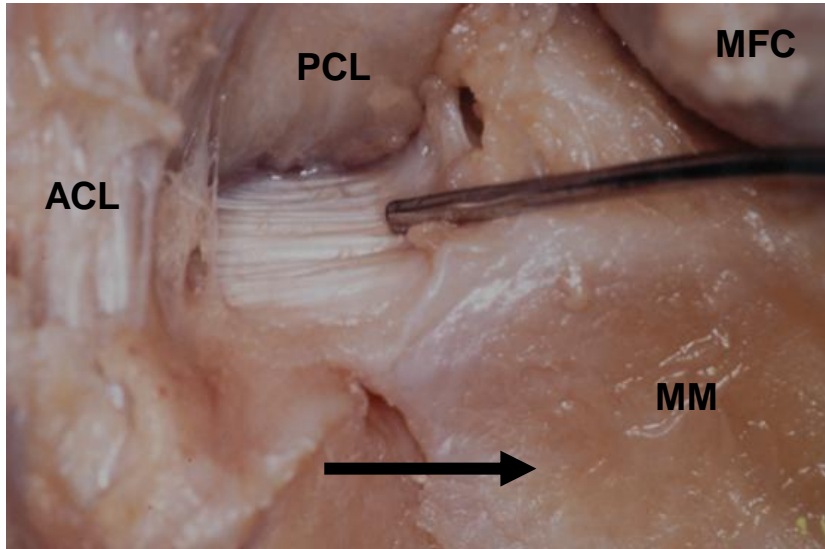**B**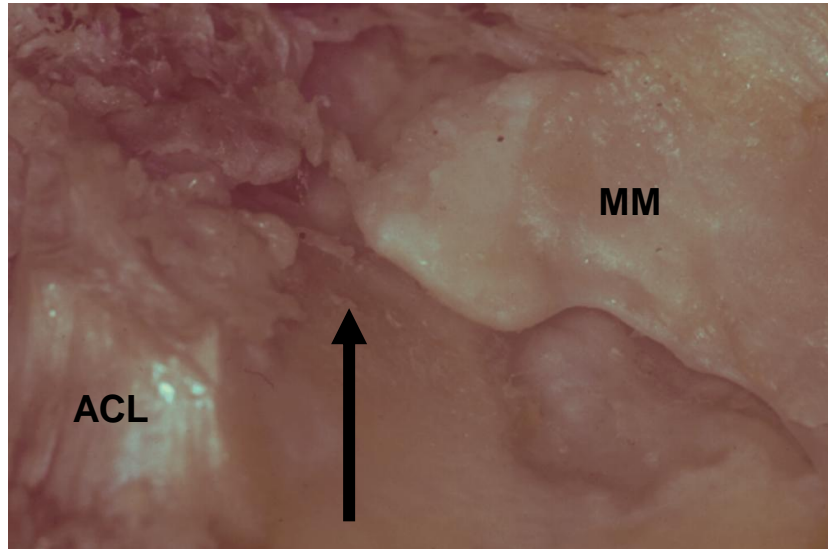

Supplement: MOESM1 [file 9667604]
